# Supplementary material
Source: HighWire-hosted journal article supplement (https://www.cfp.ca/highwire/filestream/34668/field_highwire_adjunct_files/0/539_2018-Health-Record-ages-18-to-24-years.pdf)

## Preventive Care for Ages 18 to 24 years The Greig Health Record for Young Adults

Name: \_\_\_\_\_  
Date of Birth: \_\_\_\_\_

(this page is for recording preventive care manoeuvres when they are performed, at any patient visit)

|                                            |                                                          | Age | Age | Age | Age |
|--------------------------------------------|----------------------------------------------------------|-----|-----|-----|-----|
| <b>Date</b>                                |                                                          |     |     |     |     |
| <b>Measurements</b>                        | <b>Wt</b>                                                |     |     |     |     |
|                                            | <b>BMI</b>                                               |     |     |     |     |
|                                            | <b>Ht</b>                                                |     |     |     |     |
|                                            | <b>BMI percentile</b>                                    |     |     |     |     |
| <b>Psychosocial history</b>                | • Employment, Education & Finances                       |     |     |     |     |
|                                            | • Peer relationships                                     |     |     |     |     |
|                                            | • Family relationships                                   |     |     |     |     |
|                                            | • Strengths & Goals                                      |     |     |     |     |
|                                            | • Mental Health                                          |     |     |     |     |
|                                            | • Sexual Health, Relationships & Safety                  |     |     |     |     |
|                                            | • Abuse and Bullying                                     |     |     |     |     |
| <b>Nutrition</b>                           | • Healthy choices / snacks / junk-food                   |     |     |     |     |
|                                            | • Supplements / CAM                                      |     |     |     |     |
|                                            | • Body Image / Dieting                                   |     |     |     |     |
| <b>Education &amp; Advice: Behaviour</b>   | • <b>Physical Activity</b>                               |     |     |     |     |
|                                            | • Electronic Media & Communication/Hearing Protection    |     |     |     |     |
|                                            | • Sleep Issues                                           |     |     |     |     |
| <b>Injury Prevention &amp; Safety</b>      | • <b>Helmet safety</b>                                   |     |     |     |     |
|                                            | • <b>Vehicle Safety &amp; Seatbelts</b>                  |     |     |     |     |
|                                            | • Workplace                                              |     |     |     |     |
|                                            | • <i>Sun Safety</i>                                      |     |     |     |     |
|                                            | • Environmental Hazards – incl. <b>Second Hand Smoke</b> |     |     |     |     |
| <b>Other</b>                               | • <i>Smoke Detectors</i>                                 |     |     |     |     |
|                                            | • Other Safety Topics                                    |     |     |     |     |
|                                            | • Substances and Addictions                              |     |     |     |     |
|                                            | • <b>Dental care, fluoride</b>                           |     |     |     |     |
| <b>Specific Concerns</b>                   |                                                          |     |     |     |     |
| <b>Examination</b>                         | <b>Blood Pressure</b>                                    |     |     |     |     |
|                                            | Head & Neck                                              |     |     |     |     |
|                                            | Visual Acuity (L)                                        |     |     |     |     |
|                                            | (R)                                                      |     |     |     |     |
|                                            | CVS                                                      |     |     |     |     |
|                                            | Chest                                                    |     |     |     |     |
|                                            | Back                                                     |     |     |     |     |
|                                            | Abd                                                      |     |     |     |     |
| GU                                         |                                                          |     |     |     |     |
|                                            | Skin                                                     |     |     |     |     |
| <b>Assessment Immunization Medications</b> | Up-date immunizations                                    |     |     |     |     |
|                                            | Discuss influenza vaccination                            |     |     |     |     |
|                                            | Signature                                                |     |     |     |     |

© A. Greig  
2018

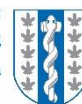

Supplement: 539_2018-Health-Record-ages-18-to-24-years.pdf [file 539_2018-Health-Record-ages-18-to-24-years.pdf]
